# Supplementary material for: Optimizing Agrobacterium-Mediated Transformation and CRISPR-Cas9 Gene Editing in the tropical japonica Rice Variety Presidio
Source: MDPI journal article supplement (doi:10.3390/ijms222010909), 2021-10-09
Supplement: s1 [file s1]

## Supplementary Materials

**Supplementary Table S1.** Sequences of gRNAs and PAMs targeting the *PDS* and *YSA* genes

| Target              | gRNA + <u>PAM</u>                   | Target region |
|---------------------|-------------------------------------|---------------|
| <i>OsPDS</i> sgRNA1 | 5' GCAAAATATCTGGCAGATGCT <u>TGG</u> | Exon 3        |
| <i>OsPDS</i> sgRNA2 | 5' GGAAGGATGAAGATGGAGATT <u>TGG</u> | Exon 4        |
| <i>OsYSA</i> sgRNA1 | 5' <u>CCC</u> CGCGTTTGCGCCGCCCTCG   | Exon 1        |
| <i>OsYSA</i> sgRNA2 | 5' <u>CCG</u> CTTCGGCCGAGGTGGCGCGC  | Exon 1        |

| Gene        | Phenotype  | gRNA1        | gRNA2      |
|-------------|------------|--------------|------------|
| PDS 1       | White      | Homozygous   | Biallelic  |
| PDS 2       | White      | Homozygous   | Homozygous |
| PDS 3       | White      | Homozygous   | Homozygous |
| PDS 4       | Green      | Heterozygous | Wild-type  |
| PDS 5       | Green      | Heterozygous | Biallelic  |
| PDS 6       | Green      | Heterozygous | Homozygous |
| PDS 7       | Variegated | Heterozygous | Biallelic  |
| PDS 8       | Green      | Heterozygous | Biallelic  |
| PDS 9       | Green      | Heterozygous | Biallelic  |
| PDS 10      | White      | Homozygous   | Biallelic  |
| PDS 11      | White      | Heterozygous | Biallelic  |
| PDS 12      | White      | Biallelic    | Biallelic  |
| PDS 27 high | White      | Homozygous   | Homozygous |
| PDS 27 low  | White      | Homozygous   | Homozygous |
| PDS 28 high | White      | Homozygous   | Homozygous |
| PDS 28 low  | White      | Biallelic    | Homozygous |
| PDS 29 high | White      | Homozygous   | Biallelic  |
| PDS 29 low  | White      | Homozygous   | Homozygous |
| PDS 30      | White      | Homozygous   | Homozygous |
| PDS 31      | White      | Homozygous   | Homozygous |
| PDS 32      | White      | Homozygous   | Biallelic  |

| Gene     | Phenotype        | gRNA1      | gRNA2      |
|----------|------------------|------------|------------|
| YSA 17   | Green            | Homozygous | Homozygous |
| YSA 19   | Green            | Homozygous | Homozygous |
| YSA 20   | Green            | Biallelic  | Homozygous |
| YSA 21   | Green            | Homozygous | Homozygous |
| YSA 22   | Green            | Homozygous | Homozygous |
| YSA 23   | Green            | Biallelic  | Biallelic  |
| YSA 24   | Green            | Homozygous | Homozygous |
| YSA 25   | Green            | Homozygous | Homozygous |
| YSA 26   | Green            | Homozygous | Homozygous |
| YSA 35.1 | Green leaf part  | Homozygous | Homozygous |
| YSA 36   | Green            | Biallelic  | Homozygous |
| YSA 37   | Young white leaf | Homozygous | Biallelic  |
| YSA 38   | Young white leaf | Biallelic  | Homozygous |
| YSA 39   | Green            | Biallelic  | Homozygous |
| YSA 40   | Variegated       | Homozygous | Homozygous |
| YSA 41   | Variegated       | Homozygous | Homozygous |

**Supplementary Table S2.** Phenotypes of edited progeny and mutations at targeted loci. Visible phenotypes (white, green, or variegated leaves) and mutations detected at each gRNA site for (a) *PDS* and (b) *YSA*, including homozygous monoallelic, biallelic, heterozygous, and wild type.

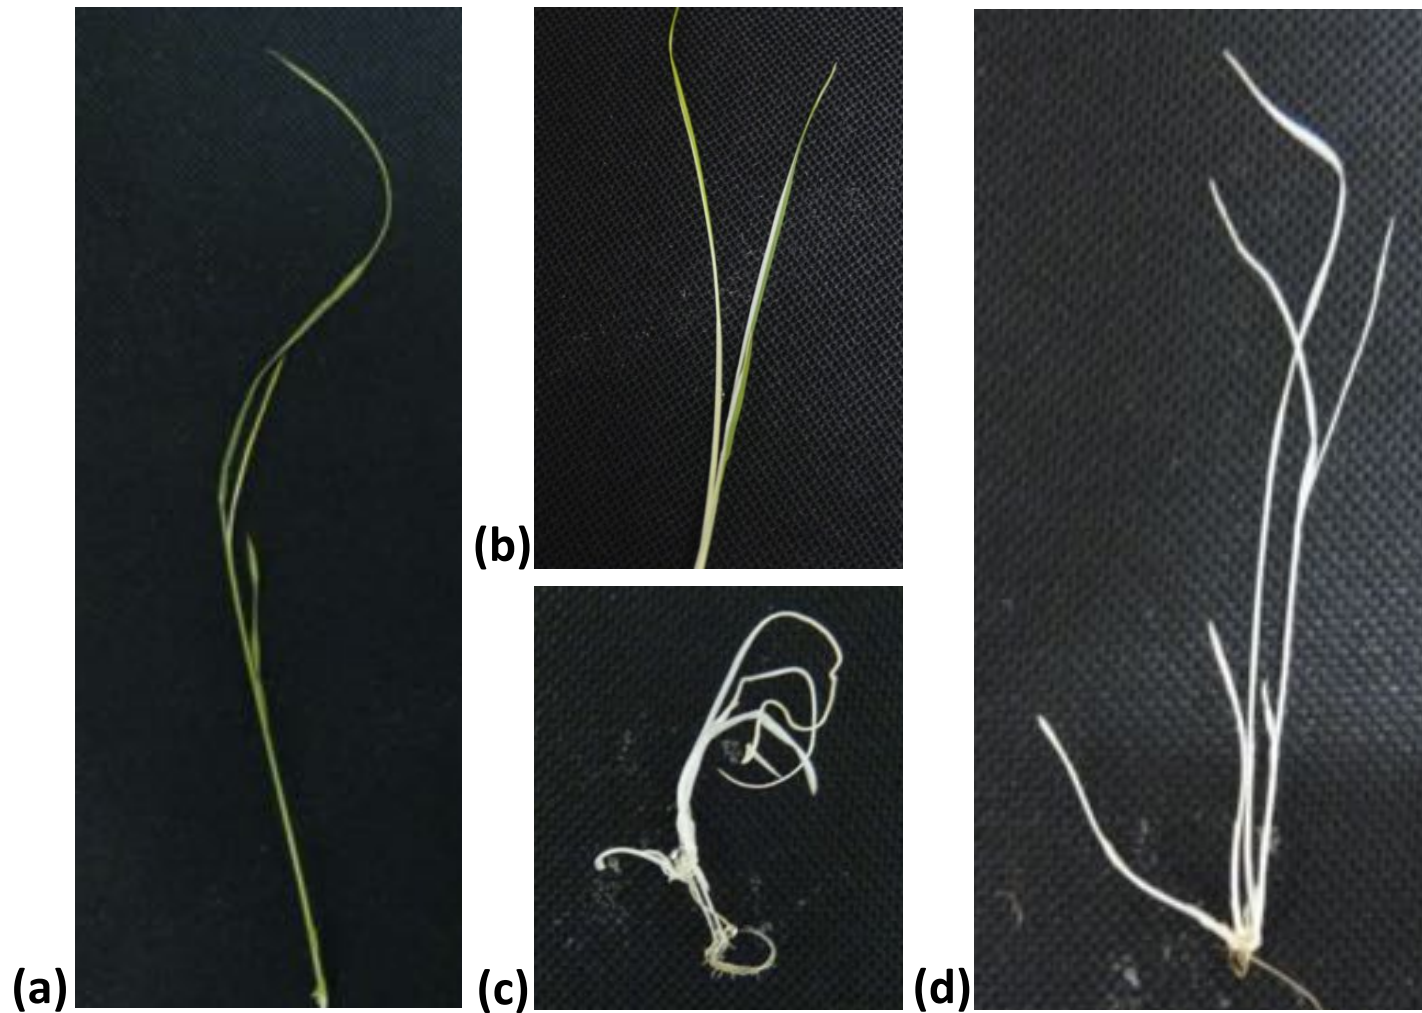

**Supplementary Figure S1.** Phenotypes of *PDS* edited progeny. The sgRNAs targeting the *PDS* gene induced several different phenotypes from the gene knockouts: (a) empty vector controls appeared as green wild type plants; while various mutations appeared as (b) variegated plants, (c) dwarf albino plant, and (d) normal-size albino plant.

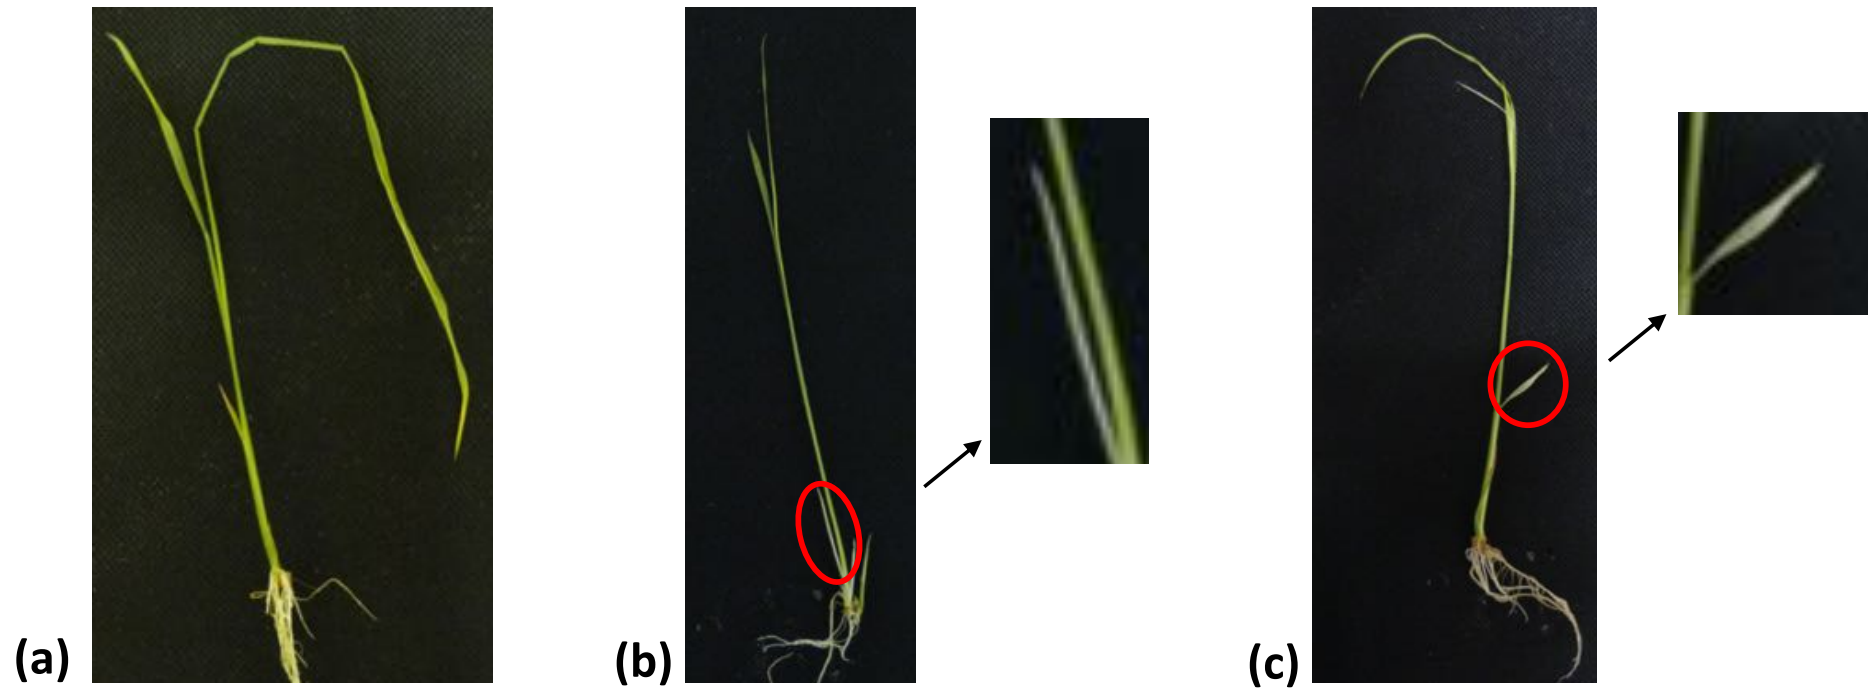

**Supplementary Figure S2.** Phenotypes of YSA edited progeny. The sgRNAs targeting the YSA gene induced more subtle phenotypes from the gene knockouts: (a) empty vector controls appeared as green wild type plants; while mutations appeared as (b) variegated plants with green and albino sectors and (c) variegated plants with albino leaf tips.

|                                          |     |          |                                                                                           |
|------------------------------------------|-----|----------|-------------------------------------------------------------------------------------------|
| Homozygous<br>monoallelic<br>mutation    | (a) | Template | GATTTTTTTTCAGGATTAGCTGGTTTATCAACGGCAAAATATCTGGCAGATGCTGGTCATAAACCCATATTGCTTGAGGCAAGGGC    |
|                                          |     | PDS 3-1  | × GATTTTTTTTCAGGATTA-----GCTGGTCATAAACCCATATTGCTTGAGGCAAGGGC                              |
|                                          |     | PDS 3-2  | × GATTTTTTTTCAGGATTA-----GCTGGTCATAAACCCATATTGCTTGAGGCAAGGGC                              |
|                                          |     | PDS 3-3  | × GATTTTTTTTCAGGATTA-----GCTGGTCATAAACCCATATTGCTTGAGGCAAGGGC                              |
|                                          |     | PDS 3-4  | × GATTTTTTTTCAGGATTA-----GCTGGTCATAAACCCATATTGCTTGAGGCAAGGGC                              |
|                                          |     | PDS 3-5  | × GATTTTTTTTCAGGATTA-----GCTGGTCATAAACCCATATTGCTTGAGGCAAGGGC                              |
| Biallelic<br>mutation                    | (b) | Template | ATTAGCTGGTTTATCAACGGCAAAATATCTGGCAGATGCTGGTCATAAACCCATATTGCTTGAGGCAAGGGATGTTTTGGGTGGA     |
|                                          |     | PDS 12-1 | × ATTAGCTGGTTTATCAACGGCAAAATATCTGGCAGATGCTGGTCATAAACCCATATTGCTTGAGGCAAGGGATGTTTTGGGTGGA   |
|                                          |     | PDS 12-2 | × ATTAGCTGGTTTATCAACGGCAAAATATCTGGC-----TGCTGGTCATAAACCCATATTGCTTGAGGCAAGGGATGTTTTGGGTGGA |
|                                          |     | PDS 12-3 | × ATTAGCTGGTTTATCAACGGCAAAATATCTGGC-----TGCTGGTCATAAACCCATATTGCTTGAGGCAAGGGATGTTTTGGGTGGA |
|                                          |     | PDS 12-4 | × ATTAGCTGGTTTATCAACGGCAAAATATCTGGC-----TGCTGGTCATAAACCCATATTGCTTGAGGCAAGGGATGTTTTGGGTGGA |
|                                          |     | PDS 12-5 | × ATTAGCTGGTTTATCAACGGCAAAATATCTGGCAGATGCTGGTCATAAACCCATATTGCTTGAGGCAAGGGATGTTTTGGGTGGA   |
| Heterozygous<br>(mutation/<br>wild type) | (c) | Template | TTTTTCAGGATTAGCTGGTTTATCAACGGCAAAATATCTGGCAGATGCTGGTCATAAACCCATATTGCTTGAGGCAAGGGATGTTTT   |
|                                          |     | PDS 4-1  | × TTTTCAGGATTAGCTGGTTTATCAACGGCAAAATATCTGGCAGATGCTGGTCATAAACCCATATTGCTTGAGGCAAGGGATGTTTT  |
|                                          |     | PDS 4-2  | × TTTTCAGGATTAGCTGGTTTATCAACGGCAAAATATCTGGCAGATGCTGGTCATAAACCCATATTGCTTGAGGCAAGGGATGTTTT  |
|                                          |     | PDS 4-3  | × TTTTCAGGATTAGCTGGTTTATCAACGGCAAAATACCTGGCAGATGCTGGTCATAAACCCATATTGCTTGAGGCAAGGGATGTTTT  |
|                                          |     | PDS 4-4  | × TTTTCAGGATTAGCTGGTTTATCAACGGCAAAATATCTGGCAGATGCTGGTCATAAACCCATATTGCTTGAGGCAAGGGATGTTTT  |
|                                          |     | PDS 4-5  | × TTTTCAGGATTAGCTGGTTTATCAACGGCAAAATATCTGGCAGATGCTGGTCATAAACCCATATTGCTTGAGGCAAGGGATGTTTT  |
| Heterozygous<br>(mutation/<br>wild type) | (d) | Template | TTTTTTTCAGGATTAGCTGGTTTATCAACGGCAAAATATCTGGCAGATGCTGGTCATAAACCCATATTGCTTGAGGCAAGGGATG     |
|                                          |     | PDS 8-1  | × TTTTTTTCAGGATTAGCTGGTTTATCAACGGCAAAATATCTGGCAGATGCTGGTCATAAACCCATATTGCTTGAGGCAAGGGATG   |
|                                          |     | PDS 8-2  | × TTTTTTTCAGGATTA-----GCTGGTCATAAACCCATATTGCTTGAGGCAAGGGATG                               |
|                                          |     | PDS 8-3  | × TTTTTTTCAGGATTA-----GCTGGTCATAAACCCATATTGCTTGAGGCAAGGGATG                               |
|                                          |     | PDS 8-4  | × TTTTTTTCAGGATTAGCTGGTTTATCAACGGCAAAATATCTGGCAGATGCTGGTCATAAACCCATATTGCTTGAGGCAAGGGATG   |
|                                          |     | PDS 8-5  | × TTTTTTTCAGGATTAGCTGGTTTATCAACGGCAAAATATCTGGCAGATGCTGGTCATAAACCCATATTGCTTGAGGCAAGGGATG   |

**Supplementary Figure S3.** Sanger sequence data from 5 cloned PCR products for each of four representative edited progeny for the PDS gene target. Sequence analysis revealed three types of alleles: (a) homozygous monoallelic mutation (in this case a 33 bp deletion); (b) biallelic mutation (3 bp deletion and a 1 bp insertion); (c) heterozygous (1 bp substitution and wild type allele); and (d) heterozygous (33 bp deletion and wild type allele).



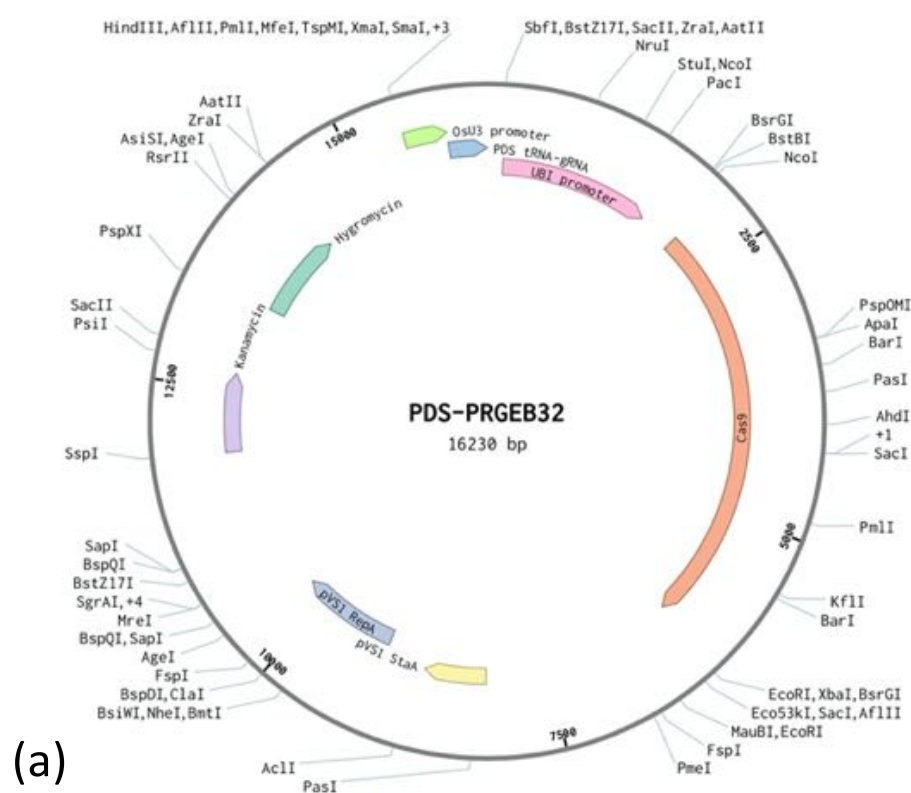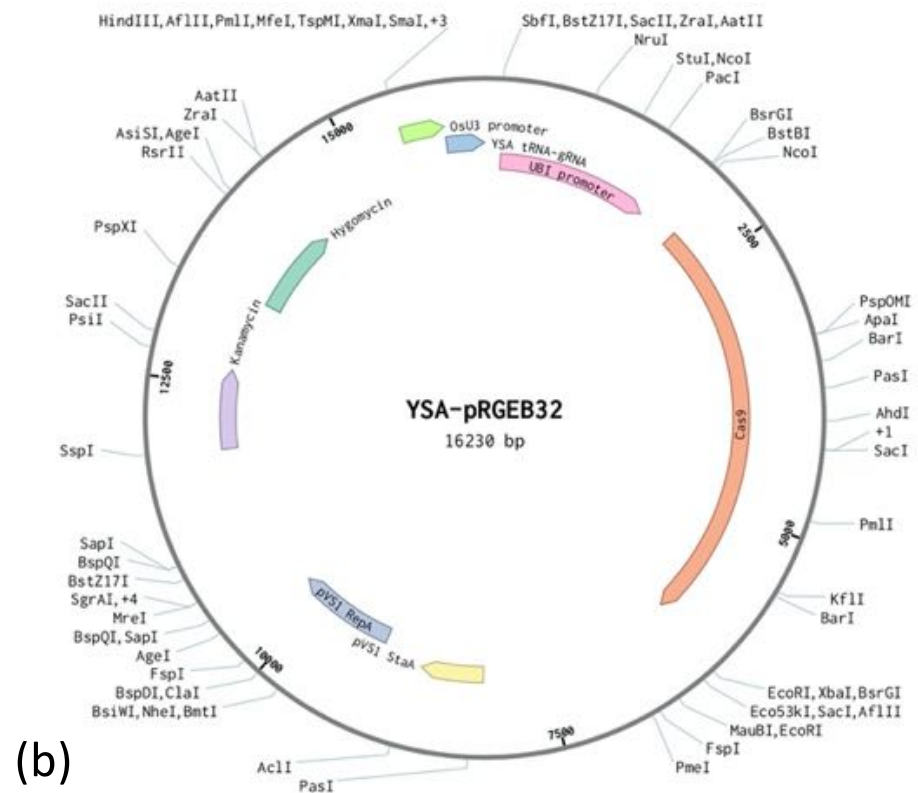

**Supplementary Figure S4.** Plasmid maps of the pRGEB32 binary vector for the (a) *PDS* and (b) *YSA* gene targets. A synthetic DNA fragment containing the polycistronic tRNA-gRNA module was inserted behind the U3 promoter in the pRGEB32 binary vector (Addgene Plasmid #63142), which also has selectable markers and Cas9 expressed from a ubiquitin promoter.
